# Supplementary material for: Erk5 Is a Key Regulator of Naive-Primed Transition and Embryonic Stem Cell Identity
Source: PubMed Central journal article supplement (PMC4987282; doi:10.1016/j.celrep.2016.07.033), 2016-08-04
Supplement: mmc1.pdf [file mmc1.pdf]

**Cell Reports, Volume 16**

**Supplemental Information**

**Erk5 Is a Key Regulator of Naive-Primed  
Transition and Embryonic Stem Cell Identity**

**Charles A.C. Williams, Rosalia Fernandez-Alonso, Jinhua Wang, Rachel Toth, Nathanael S. Gray, and Greg M. Findlay**

## Supplemental Information

### Supplemental Figure legends

**Figure S1, related to Figure 2** A) Erk5<sup>+/+</sup> mESCs were treated with XMD8-92 at varying concentrations for 2 days, and relative cell survival determined. Data are represented as average  $\pm$  SD from 3 independent experiments. B) mESCs were treated with the indicated concentrations of AZD4547, Ruxolitinib, XMD8-92 and JWG-071 for 48h, and levels of Nanog, Dnmt3b and Erk1/2 determined by immunoblotting. Intervening lanes were removed, as indicated by a dotted line (n=3). C) mESCs were treated with 1 $\mu$ M AZD4547, Ruxolitinib and JWG-071 for 48h, and Dnmt3b mRNA levels determined by qRT-PCR. Data are represented as average  $\pm$  SD from a representative experiment (n=3). D) mESCs were transfected with control non-targeting siRNA or siRNA targeting Dnmt3b. Dnmt3b and Sox2 were analysed by immunoblotting (n=3). E) mESCs were transfected with Cas9 D10A and either control gRNAs or gRNAs specifically targeting Brd4, Grb2 or Stat3 and levels of Brd4, Grb2, Stat3 and Erk1/2 determined by immunoblotting (n=3).

**Figure S2, related to Figure 3.** A) Erk5<sup>+/+</sup> or Erk5<sup>-/-</sup> mESCs were transfected with either empty vector or Erk5 cDNA, and Klf2 mRNA (left panel) or Erk5 and Erk1/2 expression (right panel) determined by immunoblotting. Data are represented as average  $\pm$  SD from a representative experiment (n=3). B) Erk5<sup>+/+</sup> mESCs were treated with indicated concentrations of Mek5 inhibitor BIX 02189 or Erk5 inhibitor JWG-071. Klf2 and Erk5 levels were determined by immunoblotting (n=3). C) Erk5<sup>+/+</sup> mESCs were transfected with empty vector or Mek5DD cDNA and Fgf5 mRNA levels at indicated days post transfection determined by qRT-PCR. The ratio of Mek5DD/Control is represented as average  $\pm$  SD from 3 independent experiments. D) Erk5<sup>-/-</sup> mESCs were transfected with either empty vector or Erk5 cDNA, and Klf4, Erk5 and Erk1/2 expression determined by immunoblotting (n=3). E) Erk5<sup>+/+</sup> or Erk5<sup>-/-</sup> mESCs were LIF deprived for the indicated time and Klf4, Erk5 and Erk1/2 expression determined by immunoblotting. Intervening lanes were removed, as indicated by a dotted line (n=3).

**Figure S3, related to Figure 4.** A) Representative images of alkaline phosphatase stained Erk5<sup>+/+</sup> and Erk5<sup>-/-</sup> mESC colonies B) Erk5<sup>+/+</sup>, Erk5 $\Delta$ N<sup>-/-</sup> and Erk5<sup>-/-</sup> mESCs were counted over 5 days to determine relative proliferation rate (n=3). C) A single Erk5<sup>-/-</sup> mESC clone was used to generate clones of Erk5<sup>-/-</sup> mESCs re-expressing Erk5, and percentage beating compared to parental Erk5<sup>-/-</sup> and Erk5 $\Delta$ N<sup>-/-</sup> mESC lines. Data are represented as average  $\pm$  SD for 4 independent clones. D) Representative images of Erk5<sup>+/+</sup> and Erk5<sup>-/-</sup> embryoid bodies.

Figure S1, related to Figure 2

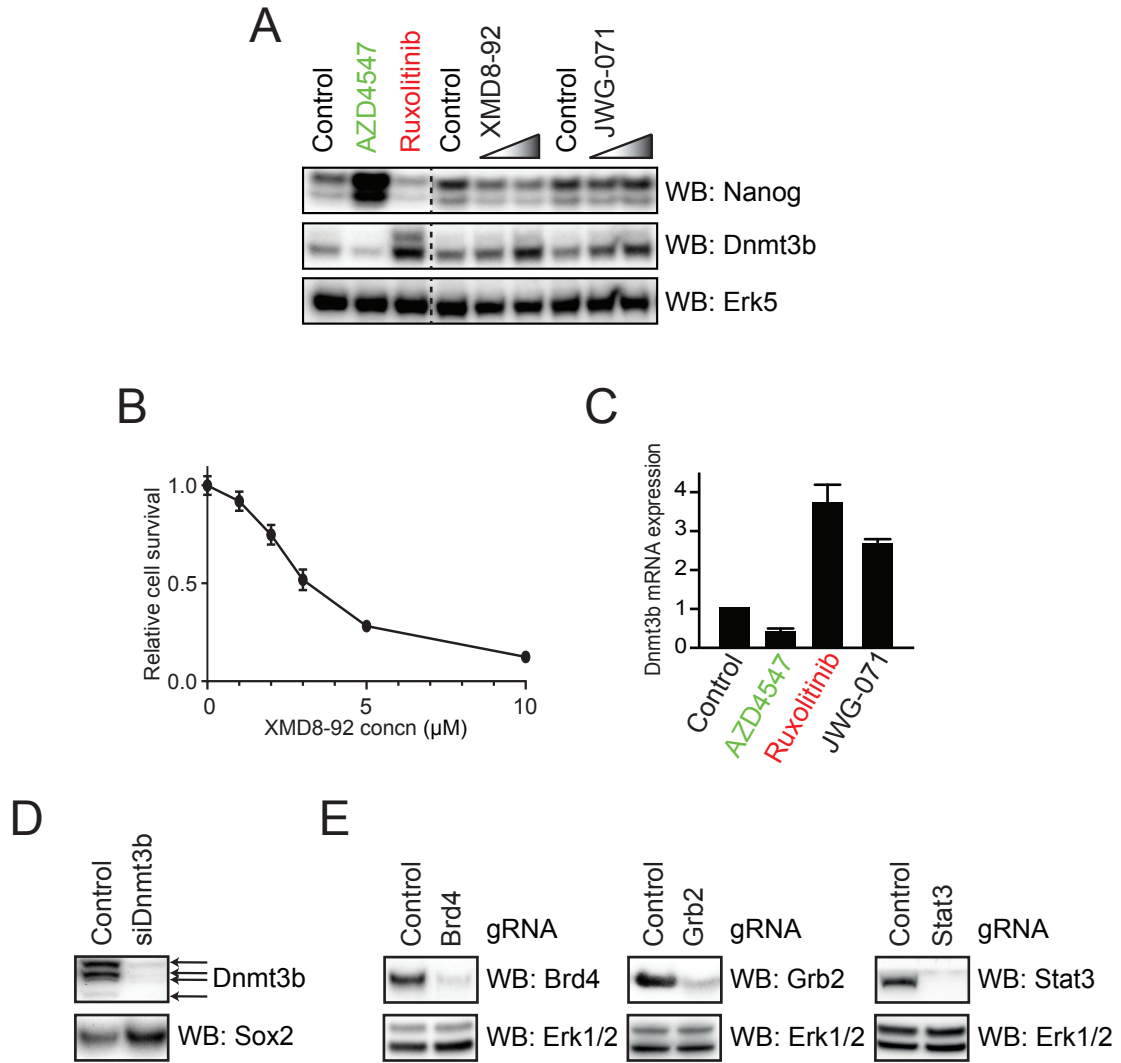

Figure S2, related to Figure 3

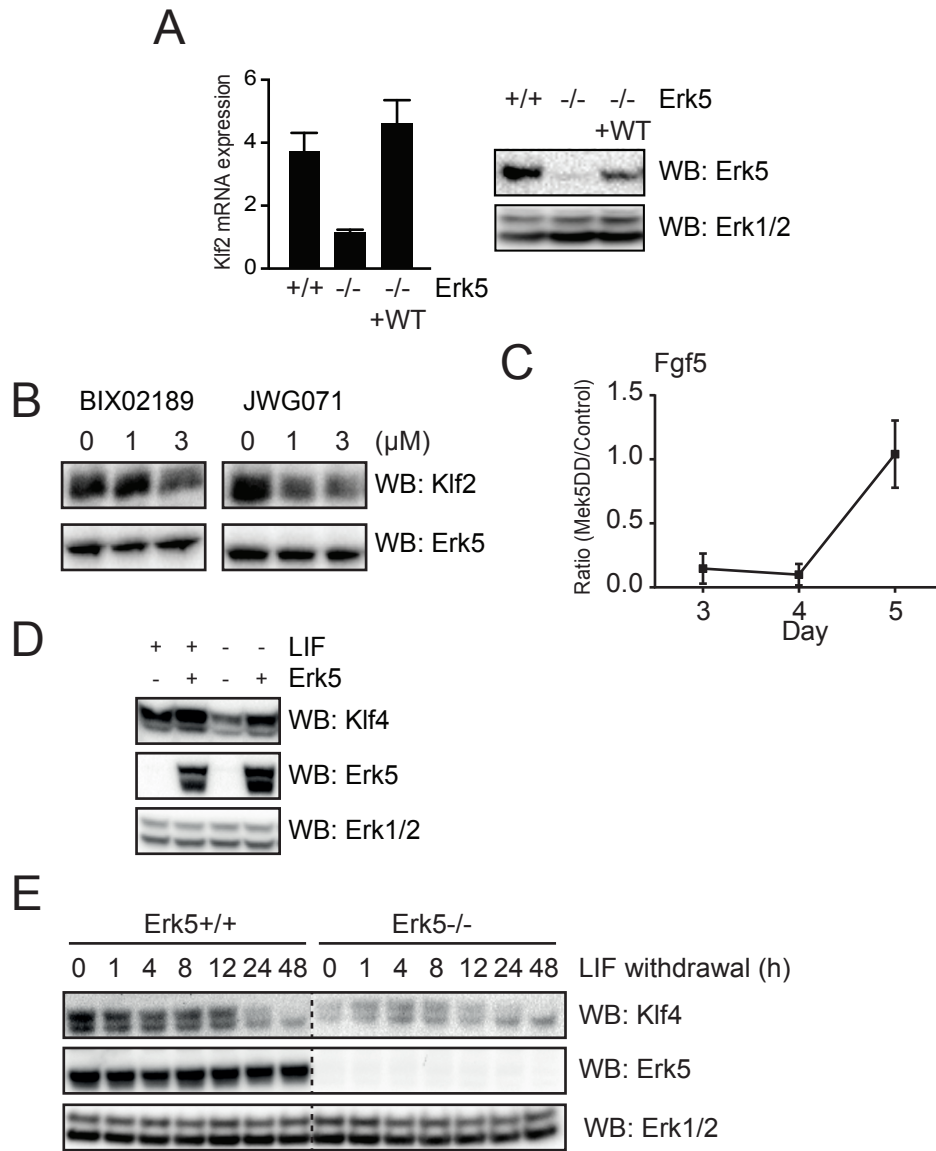



Figure S3, related to Figure 4

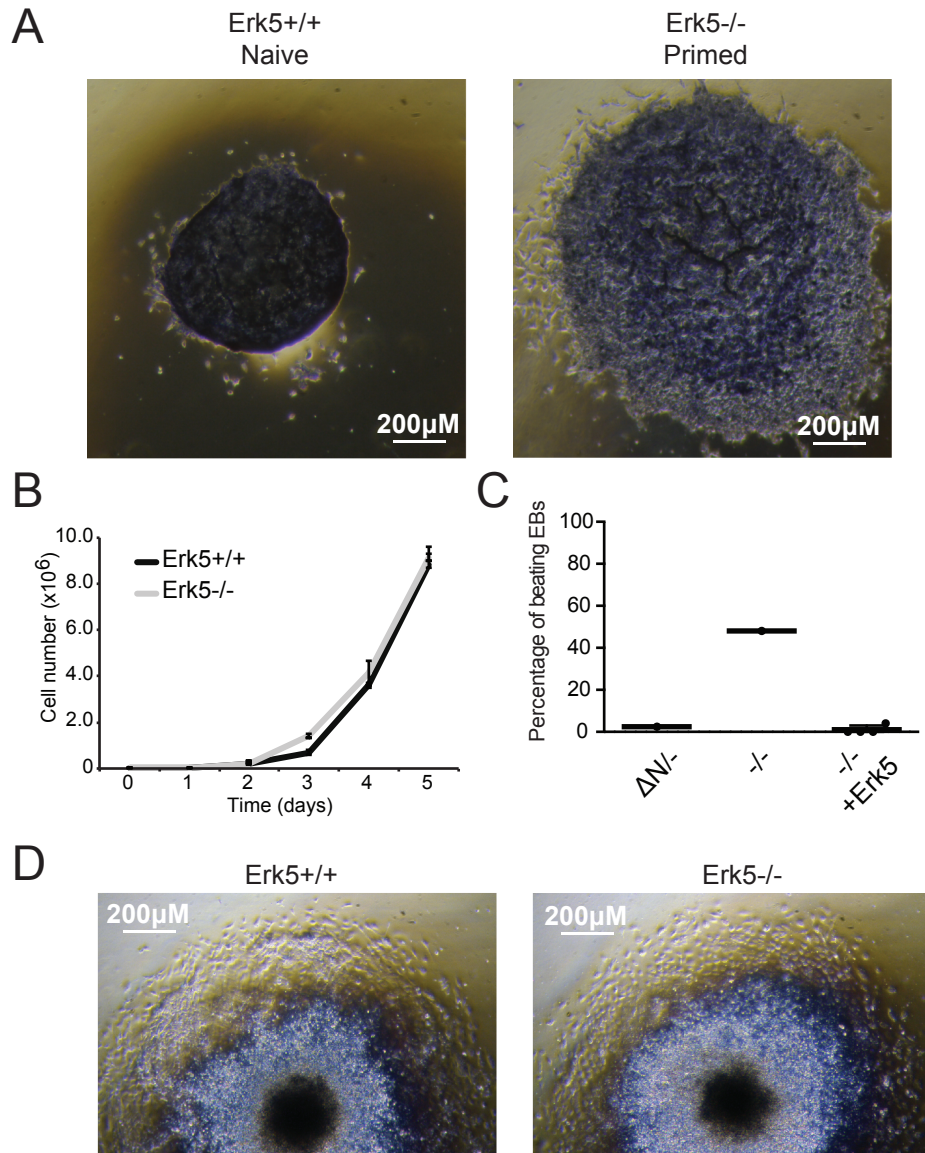

## Supplemental Tables

**Table S1. Full list of primed hits from screen, related to Figure 1**

### Primed Hits (<0.5 Nanog:Dnmt3b)

| Inhibitor                                | Primary Target(s)          | Comments                        |
|------------------------------------------|----------------------------|---------------------------------|
| Ruxolitinib                              | JAK                        | Known pluripotency regulator    |
| GDC-0879                                 | B-Raf                      | Known pluripotency regulator    |
| 17-AAG                                   | Hsp90                      | Broad spectrum kinase inhibitor |
| BX795                                    | TBK1/PDK1                  | Known pluripotency regulator    |
| TPCA-1                                   | IKK2, STAT3                | Known pluripotency regulator    |
| VX-745                                   | p38 MAPK                   | Known pluripotency regulator    |
| OSI-930                                  | c-Kit, VEGFR2              | Broad spectrum kinase inhibitor |
| XL765 (SAR245409)                        | mTOR/PI3K                  | Known pluripotency regulator    |
| D4476                                    | CK1, ALK5 (TGF $\beta$ RI) | Known pluripotency regulator    |
| KIN001-269                               | FMS                        | Broad spectrum kinase inhibitor |
| LDN193189                                | ALK2 (BMPR)                | Known pluripotency regulator    |
| SB203580                                 | p38 MAPK                   | Known pluripotency regulator    |
| ABT-869 (Linifanib/AL-39324)             | FLT-3                      | Broad spectrum kinase inhibitor |
| KIN001-236                               | Tie2                       | Broad spectrum kinase inhibitor |
| PIK-93                                   | PI3K, PI4KIII $\beta$      | Known pluripotency regulator    |
| A769662                                  | AMPK                       | Known pluripotency regulator    |
| TGX221                                   | PI3K                       | Known pluripotency regulator    |
| SU6656                                   | Src                        | Broad spectrum kinase inhibitor |
| BS-181                                   | CDK7                       | Broad spectrum kinase inhibitor |
| KIN001-260 (Bayer IKK $\beta$ inhibitor) | IKK $\beta$                | Known pluripotency regulator    |
| <b>XMD8-85</b>                           | <b>ERK5</b>                |                                 |
| Brivanib                                 | VEGFR, PDGFR               | Broad spectrum kinase inhibitor |
| CC-401                                   | JNK                        | Known pluripotency regulator    |
| CYT387                                   | JAK                        | Known pluripotency regulator    |
| NVP-BHG712                               | EPHB4                      | Broad spectrum kinase inhibitor |
| ABT-737                                  | Bcl-2                      | Non-kinase                      |
| Regorafenib (BAY 73-4506)                | c-KIT, VEGFR2, B-Raf       | Broad spectrum kinase inhibitor |
| BAY-439006                               | B-Raf                      | Known pluripotency regulator    |
| RAF-265 (CHIR-265)                       | B-Raf                      | Known pluripotency regulator    |
| BIRB-796 (Doramapimod)                   | p38 MAPK                   | Known pluripotency regulator    |

**Table S2. Full list of naïve hits from screen, related to Figure 1****Naïve Hits (>2 Nanog:Dnmt3b)**

| <b>Inhibitor</b>         | <b>Primary Target(s)</b>        | <b>Comments</b>                 |
|--------------------------|---------------------------------|---------------------------------|
| AZD8330                  | MEK1/2                          | Known pluripotency regulator    |
| GSK-1120212 (JTP-74057)  | MEK1/2                          | Known pluripotency regulator    |
| BIBF-1120 (Vargatef)     | VEGFR, PDGFR and FGFR           | Known pluripotency regulator    |
| WZ-4-145                 | CSF1R/DDR1/EGFR/TIE1/<br>PDGFR2 | Broad spectrum kinase inhibitor |
| PD173074                 | FGFR                            | Known pluripotency regulator    |
| HG-6-64-01               | Tyrosine kinases                | Broad spectrum kinase inhibitor |
| WZ-7043                  | CSF1R/DDR1/FGFR/TAO1            | Known pluripotency regulator    |
| AP24534 (Ponatinib)      | BCR-ABL                         | Broad spectrum kinase inhibitor |
| <b>NU7441 (KU 57788)</b> | <b>DNA-PK</b>                   | <b>Under investigation</b>      |
| AZD4547                  | FGFR                            | Known pluripotency regulator    |
| KIN001-043               | GSK3                            | Known pluripotency regulator    |
| BGJ398                   | FGFR                            | Known pluripotency regulator    |
| HG-14-10-04              | ALK                             | Broad spectrum kinase inhibitor |
| GW786034 (Pazopanib)     | VEGFR1                          | Broad spectrum kinase inhibitor |
| AZD6244 (Selumetinib)    | MEK1/2                          | Known pluripotency regulator    |
| MK2206                   | AKT1                            | Known pluripotency regulator    |
| GDC-0941                 | PI3K                            | Known pluripotency regulator    |
| R406                     | Syk                             | Broad spectrum kinase inhibitor |
| AZD0530 (Saracatinib)    | Src                             | Broad spectrum kinase inhibitor |
| PD0325901                | MEK1/2                          | Known pluripotency regulator    |
| HG-5-113-01              | LOK/LTK/TRCB/ABL(T315I)         | Broad spectrum kinase inhibitor |
| Dasatinib                | Src family                      | Broad spectrum kinase inhibitor |
| AZD6482                  | PI3K                            | Known pluripotency regulator    |

**Table S3. Sequences of Erk5 gene targeted mESC lines, related to Figure 2.**

| Erk5 Line | Allele Summary     | DNA Sequence                                                                                                                                                                                    |
|-----------|--------------------|-------------------------------------------------------------------------------------------------------------------------------------------------------------------------------------------------|
| +/+       | wild-type          | A C C A A T G C C A A A C G G A C C C T C A G G G A G C T G A A G A T C C T C A A A C A C T T C A A A C A G G A C A A T A T C A T C G C C A T C A A G G A C A T C C T G A A G C C T A C T G T G |
| ΔN/-      | A1 in frame        | A C C A A T G C C A A A C G G A C C C T C A G G G A G C T G A A G A T C C T C A A A C                                                                                                           |
|           | A2 large insertion | A C C A A T G C C A A A C G G A C C C T C A G G G A G C T G A A G A T C C T C A A A C A C T T C A A A C A G G A C A A T A T C A T C G C C A T C A A G G A C A T C C T G A A G C C T A C T G T G |
| ΔN/-      | A1 in frame        | A C C A A T G C C A A A C G G A C C C T C A G G G A G C T G A A G A T C C T C A A A C A C T T C A A A C A G G A C A A T A T C A T C G C C A T C A A G G A C A T C C T G A A G C C T A C T G T G |
|           | A2 frameshift      | A C C A A T G C C A A A C G G A C C C T C A G G G A G C T G A A G A T C C T C A A A C A C T T C A A A C A G G A C A A T A T C A T C G C C A T C A A G G A C A T C C T G A A G C C T A C T G T G |
| -/-       | A1 frameshift      | A C C A A T G C C A A A C G G A C C C T C A G G G A G C T G A A G A T C C T C A A A C A C T T C A A A C A G G A C A A T A T C A T C G C C A T C A A G G A C A T C C T G A A G C C T A C T G T G |
|           | A2 frameshift      | A C C A A T G C C A A A C G G A C C C T C A G G G A G C T G A A G A T C C T C A A A C A C T T C A A A C A G G A C A A T A T C A T C G C C A T C A A G G A C A T C C T G A A G C C T A C T G T G |
| ΔN/-      | A1 in frame        | A C C A A T G C C A A A C G G A C C C T C A G G G A G C T G A A G A T C C T C A A A C A C T T C A A A C A G G A C A A T A T C A T C G C C A T C A A G G A C A T C C T G A A G C C T A C T G T G |
|           | A2 large insertion | A C C A A T G C C A A A C G G A C C C T C A G G G A G C T G A A G A T C C T C A A A C A C T T C A A A C A G G A C A A T A T C A T C G C C A T C A A G G A C A T C C T G A A G C C T A C T G T G |
| -/-       | A1 frameshift      | A C C A A T G C C A A A C G G A C C C T C A G G G A G C T G A A G A T C C T C A A A C A C T T C A A A C A G G A C A A T A T C A T C G C C A T C A A G G A C A T C C T G A A G C C T A C T G T G |
|           | A2 frameshift      | A C C A A T G C C A A A C G G A C C C T C A G G G A G C T G A A G A T C C T C A A A C A C T T C A A A C A G G A C A A T A T C A T C G C C A T C A A G G A C A T C C T G A A G C C T A C T G T G |
| -/-       | A3 frameshift      | A C C A A T G C C A A A C G G A C C C T C A G G G A G C T G A A G A T C C T C A A A C A C T T C A A A C A G G A C A A T A T C A T C G C C A T C A A G G A C A T C C T G A A G C C T A C T G T G |
|           | A1 frameshift      | A C C A A T G C C A A A C G G A C C C T C A G G G A G C T G A A G A T C C T C A A A C A C T T C A A A C A G G A C A A T A T C A T C G C C A T C A A G G A C A T C C T G A A G C C T A C T G T G |
| -/-       | A2 large insertion | A C C A A T G C C A A A C G G A C C C T C A G G G A G C T G A A G A T C C T C A A A C A C T T C A A A C A G G A C A A T A T C A T C G C C A T C A A G G A C A T C C T G A A G C C T A C T G T G |

N.B. large insertions were not sequenced

## Supplemental Experimental Procedures

**Table S4. Primers used for qRT-PCR, related to Experimental Procedures**

| <b>Gene</b> | <b>Forward</b>           | <b>Reverse</b>           |
|-------------|--------------------------|--------------------------|
| Nanog       | CTCATCAATGCCTGCAGTTTTTCA | CTCCTCAGGGCCCTTGTCAGC    |
| Oct4        | AGCTGCTGAAGCAGAAGAGG     | AGATGGTGGTCTGGCTGAAC     |
| Klf2        | CTCAGCGAGCCTATCTTGCC     | CACGTTGTTTAGGTCCTCATCC   |
| Rex1        | CCCTCGACAGACTGACCCTAA    | TCGGGGCTAATCTCACTTTCAT   |
| Essrb       | AACCGAATGTCGTCCGAAGAC    | GTGGCTGAGGGCATCAATG      |
| Fgf5        | GCTGTGTCTCAGGGGATTGT     | CACTCTCGGCCTGTCTTTTC     |
| Brachyury   | TCCCGAGACCCAGTTCATAG     | TTCTTTGGCATCAAGGAAGG     |
| Pdgfra      | TCCATGCTAGACTCAGAAAGTCAA | TCCCGGTGGACACAATTTTTC    |
| Flk1        | TCCAGAATCCTCTTCCATGC     | AAACCTCCTGCAAGCAAATG     |
| GAPDH       | CTCGTCCCGTAGACAAAA       | TGAATTTGCCGTGAGTGG       |
| Sox1        | TTCCCAGGACTCCGAGGCG      | GCTGTGTGCCTCCTCTGCGG     |
| Nkx2-5      | ACCTTTAGGAGAAGGGCGATGACT | AAGTGGGATGGATCGGAGAAAGGT |
| Nppa        | CAGAATCGACTGCCTTTTCC     | GGGGGTAGGATTGACAGGAT     |
| Tnt         | ACCCTCAGGCTCAGGTTCA      | GTGTGCAGTCCCTGTTTCA      |

## Supplemental References

- Bourillot P-Y, Aksoy I, Schreiber V, Wianny F, Schulz H, Hummel O, Hubner N, Savatier P (2009) Novel STAT3 target genes exert distinct roles in the inhibition of mesoderm and endoderm differentiation in cooperation with Nanog. *Stem cells (Dayton, Ohio)* 27: 1760-1771
- Ceccaldi R, Parmar K, Mouly E, Delord M, Kim JM, Regairaz M, Pla M, Vasquez N, Zhang Q-S, Pondarre C et al (2012) Bone marrow failure in Fanconi anemia is triggered by an exacerbated p53/p21 DNA damage response that impairs hematopoietic stem and progenitor cells. *Cell stem cell* 11: 36-49
- Chazaud C, Yamanaka Y, Pawson T, Rossant J (2006) Early lineage segregation between epiblast and primitive endoderm in mouse blastocysts through the Grb2-MAPK pathway. *Developmental cell* 10: 615-624
- Ciceri P, Müller S, O'Mahony A, Fedorov O, Filippakopoulos P, Hunt JP, Lasater EA, Pallares G, Picaud S, Wells C et al (2014) Dual kinase-bromodomain inhibitors for rationally designed polypharmacology. *Nature chemical biology* 10: 305-312
- Davies SP, Reddy H, Caivano M, Cohen P (2000) Specificity and mechanism of action of some commonly used protein kinase inhibitors. *The Biochemical journal* 351: 95-105
- Di Micco R, Fontanals-Cirera B, Low V, Ntziachristos P, Yuen SK, Lovell CD, Dolgalev I, Yonekubo Y, Zhang G, Rusinova E et al (2014) Control of embryonic stem cell identity by BRD4-dependent transcriptional elongation of super-enhancer-associated pluripotency genes. *Cell reports* 9: 234-247
- Feldman B, Poueymirou W, Papaioannou V, DeChiara T, Goldfarb M (1995) Requirement of FGF-4 for postimplantation mouse development. *Science* 267: 246-249
- Hayashi M, Kim S-W, Imanaka-Yoshida K, Yoshida T, Abel ED, Eliceiri B, Yang Y, Ulevitch RJ, Lee J-D (2004) Targeted deletion of BMK1/ERK5 in adult mice perturbs vascular integrity and leads to endothelial failure. *The Journal of clinical investigation* 113: 1138-1148
- Heinrich PC, Behrmann I, Müller-Newen G, Schaper F, Graeve L (1998) Interleukin-6-type cytokine signalling through the gp130/Jak/STAT pathway. *The Biochemical journal* 334 ( Pt 2): 297-314
- Hirasawa R, Sasaki H (2009) Dynamic transition of Dnmt3b expression in mouse pre- and early post-implantation embryos. *Gene expression patterns : GEP* 9: 27-30
- Honda T, Obara Y, Yamauchi A, Couvillon AD, Mason JJ, Ishii K, Nakahata N (2015) Phosphorylation of ERK5 on Thr732 is associated with ERK5 nuclear localization and ERK5-dependent transcription. *PLoS one* 10: e0117914
- Kasler HG, Victoria J, Duramad O, Winoto A (2000) ERK5 is a novel type of mitogen-activated protein kinase containing a transcriptional activation domain. *Molecular and cellular biology* 20: 8382-8389
- Kunath T, Saba-El-Leil MK, Almousaillekh M, Wray J, Meloche S, Smith A (2007) FGF stimulation of the Erk1/2 signalling cascade triggers transition of pluripotent embryonic stem cells from self-renewal to lineage commitment. *Development* 134: 2895-2902
- Lacout C, Pisani DF, Tulliez M, Gachelin FM, Vainchenker W, Villeval J-L (2006) JAK2V617F expression in murine hematopoietic cells leads to MPD mimicking human PV with secondary myelofibrosis. *Blood* 108: 1652-1660
- Lang SH, Frame FM, Collins AT (2009) Prostate cancer stem cells. *The Journal of pathology* 217: 299-306
- McKay R (1997) Stem Cells in the Central Nervous System. *Science* 276: 66-71
- Muller S, Filippakopoulos P, Knapp S (2011) Bromodomains as therapeutic targets. In *Expert Reviews in Molecular Medicine*.
- Nan J, Du Y, Chen X, Bai Q, Wang Y, Zhang X, Zhu N, Zhang J, Hou J, Wang Q et al (2014) TPCA-1 is a direct dual inhibitor of STAT3 and NF- $\kappa$ B and regresses mutant EGFR-associated human non-small cell lung cancers. *Molecular cancer therapeutics* 13: 617-629
- Noble MEM, Endicott JA, Johnson LN (2004) Protein kinase inhibitors: insights into drug design from structure. *Science (New York, NY)* 303: 1800-1805
- Singh SK, Clarke ID, Terasaki M, Bonn VE, Hawkins C, Squire J, Dirks PB (2003) Identification of a Cancer Stem Cell in Human Brain Tumors. *Cancer Res* 63: 5821-5828
- Slack JM (2000) Stem cells in epithelial tissues. *Science (New York, NY)* 287: 1431-1433

Sohn SJ, Li D, Lee LK, Winoto A (2005) Transcriptional regulation of tissue-specific genes by the ERK5 mitogen-activated protein kinase. *Molecular and cellular biology* 25: 8553-8566

Suzaki Y, Yoshizumi M, Kagami S, Koyama AH, Taketani Y, Houchi H, Tsuchiya K, Takeda E, Tamaki T (2002) Hydrogen peroxide stimulates c-Src-mediated big mitogen-activated protein kinase 1 (BMK1) and the MEF2C signaling pathway in PC12 cells: potential role in cell survival following oxidative insults. *The Journal of biological chemistry* 277: 9614-9621

Veraksa A, Del Campo M, McGinnis W (2000) Developmental patterning genes and their conserved functions: from model organisms to humans. *Molecular genetics and metabolism* 69: 85-100

Yeo J-C, Jiang J, Tan Z-Y, Yim G-R, Ng J-H, Göke J, Kraus P, Liang H, Gonzales KAU, Chong H-C et al (2014) Klf2 is an essential factor that sustains ground state pluripotency. *Cell stem cell* 14: 864-872
